# Supplementary material for: Structure and luminescence behaviour of a novel red-emitting fluoroperovskite for display backlight application
Source: Royal Society of Chemistry journal article supplement (doi:10.1039/d1dt02049h), 2021-01-01
Supplement: d1dt02049h1.pdf [file d1dt02049h1.pdf]

# Electronic Supplementary Information (ESI)

## Structure and luminescence behaviour of a novel red-emitting fluoroperovskite for backlight display

Xiaoling Xie,<sup>a</sup> Jing Wan,<sup>a</sup> Haiqi Pu,<sup>a</sup> Xi Zhang,<sup>a</sup> Song Qing,<sup>a</sup> Qiang Zhou,<sup>\*a</sup> Lingxiang Chu,<sup>a</sup> Tao

Yang,<sup>a</sup> Yayun Zhou<sup>b</sup> and Zhengliang Wang<sup>\*a</sup>

<sup>a</sup> Key Laboratory of Green-chemistry Materials in University of Yunnan Province, School of Chemistry and Environment, Yunnan Minzu University, Kunming 650500, P. R. China.

<sup>b</sup> State Key Laboratory of Luminescent Materials and Devices, Guangdong Provincial Key Laboratory of Fiber Laser Materials and Applied Techniques, South China University of Technology, Guangzhou 510641, P. R. China

**E-mail: q-zhou@ymu.edu.cn;**

**wangzhengliang@foxmail.com**

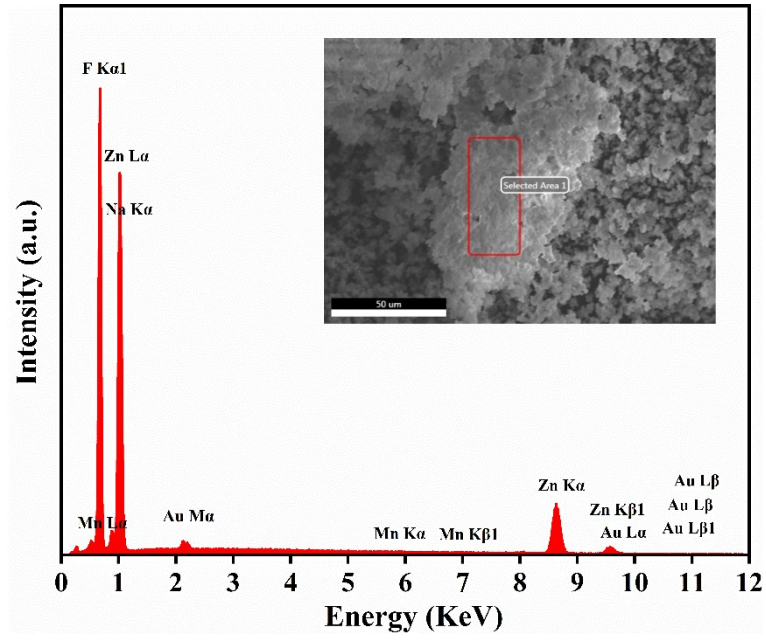

**Figure S1.** EDS spectrum of the  $\text{NaZnF}_3:0.94\%\text{Mn}^{4+}$  fluoroperovskite sample.

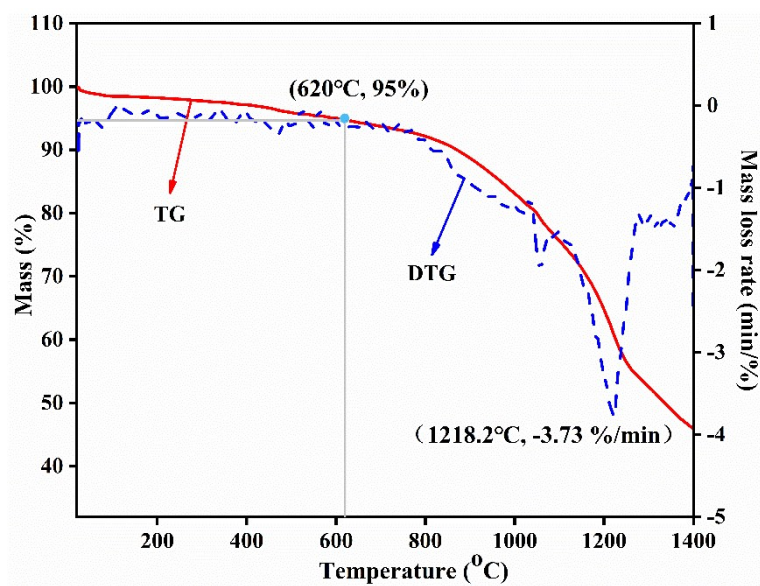

**Figure S2.** TG curve of the as-obtained NaZnF<sub>3</sub>:0.94%Mn<sup>4+</sup> fluoride perovskite product.

**Table S1.** Surface elemental composition result of the NaZnF<sub>3</sub>:0.94%Mn<sup>4+</sup> fluoride perovskite product.

| Element | Weight% | Atomic% |
|---------|---------|---------|
| F K     | 26.31   | 44.12   |
| Na K    | 22.62   | 31.35   |
| Au M    | 1.21    | 0.2     |
| Mn K    | 0.4     | 0.23    |
| Zn K    | 49.47   | 24.11   |

**Table S2.** Crystallographic data of NaZnF<sub>3</sub> fluoride perovskite before and after dopant occupation.

| Formula                   | NaZnF <sub>3</sub> host | NaZnF <sub>3</sub> :Mn <sup>4+</sup> product |
|---------------------------|-------------------------|----------------------------------------------|
| Crystal system            | orthorhombic            | orthorhombic                                 |
| Space group               | Pnma(62)                | Pnma(62)                                     |
| <i>a</i> , Å              | 5.5928(17)              | 5.5830(5)                                    |
| <i>b</i> , Å              | 7.7747(19)              | 7.7715(5)                                    |
| <i>c</i> , Å              | 5.4186(14)              | 5.4150(4)                                    |
| <i>V</i> , Å <sup>3</sup> | 235.6134(32)            | 234.9499(31)                                 |
| <i>Z</i>                  | 4                       | 4                                            |
| <i>R</i> <sub>WP</sub>    |                         | 3.55                                         |
| <i>R</i> <sub>P</sub>     |                         | 2.63                                         |
| <i>x</i> <sup>2</sup>     |                         | 1.98                                         |
